# Supplementary material for: Morphology controlled synthesis of wurtzite ZnS nanostructures through simple hydrothermal method and observation of white light emission from ZnO obtained by annealing the synthesized ZnS nanostructures
Source: Royal Society of Chemistry journal article supplement (doi:10.1039/c4tc00091a), 2014-01-01
Supplement: c4tc00091a1.pdf [file c4tc00091a1.pdf]

### Supplementary Information

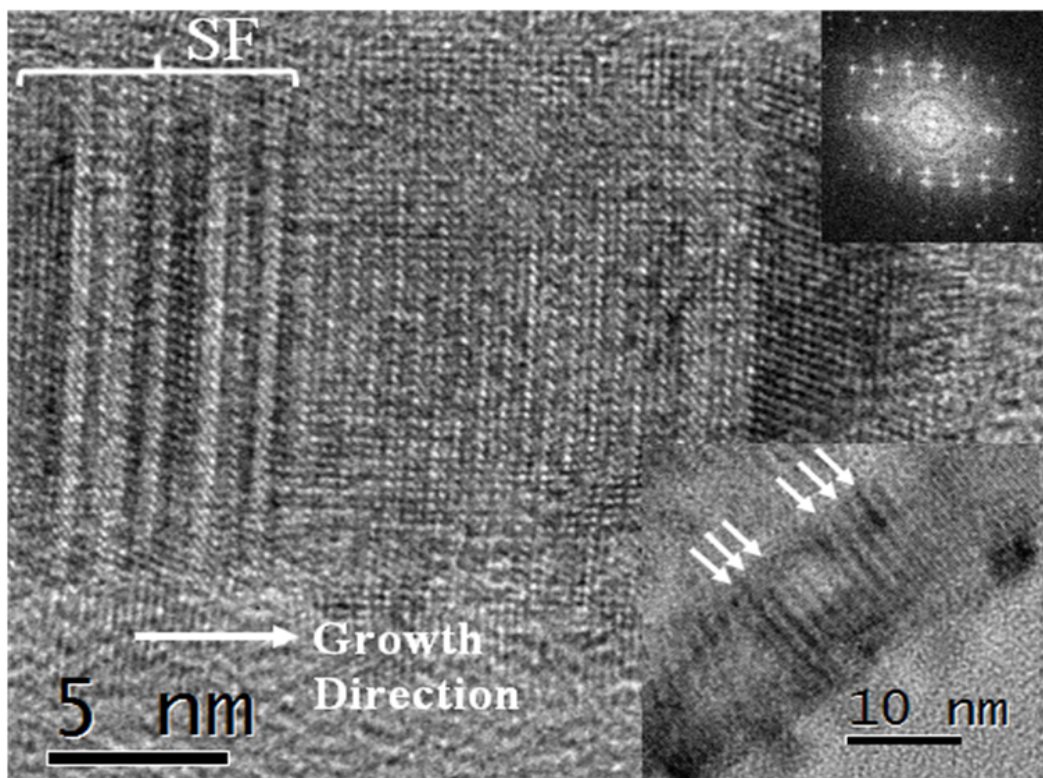

**Fig. S1** HRTEM image of S3 sample at two different magnification showing the presence of stacking faults.
